# Supplementary material for: A template-free facile approach for the synthesis of CuS–rGO nanocomposites towards enhanced photocatalytic reduction of organic contaminants and textile effluents
Source: Royal Society of Chemistry journal article supplement (doi:10.1039/c4ra09029b), 2015-01-01
Supplement: c4ra09029b1.pdf [file c4ra09029b1.pdf]

**A template-free facile approach for the synthesis of CuS/rGO nanocomposites towards enhanced photocatalytic reduction of organic contaminants and textile effluents**

Murugan Saranya<sup>a</sup>, Rajendran Ramachandran<sup>a</sup>, Prathap Kollu<sup>b</sup>, Soon Kwan Jeong<sup>c,\*</sup> and Andrews Nirmala Grace<sup>a,c,\*</sup>

<sup>a</sup>*Centre for Nanotechnology Research, VIT University, Vellore - 632 014, Tamil Nadu, India.*

<sup>b</sup>*Thin Film Magnetism Group, Department of Physics, University of Cambridge, Cambridge CB3 0HE, United Kingdom*

<sup>c</sup>*Climate Change Technology Research Division, Korea Institute of Energy Research, Yuseong-gu, Daejeon 305-343, South Korea.*

\* To whom correspondence should be addressed:

E-mail: [anirmalagrace@vit.ac.in](mailto:anirmalagrace@vit.ac.in), [anirmalagladys@gmail.com](mailto:anirmalagladys@gmail.com), [jeongsk@kier.re.kr](mailto:jeongsk@kier.re.kr);

Tel.: (+91) 416 2202412, (+82) 42 860 3367, Fax: (+91) 416 2243092, (+82) 42-860-3134.

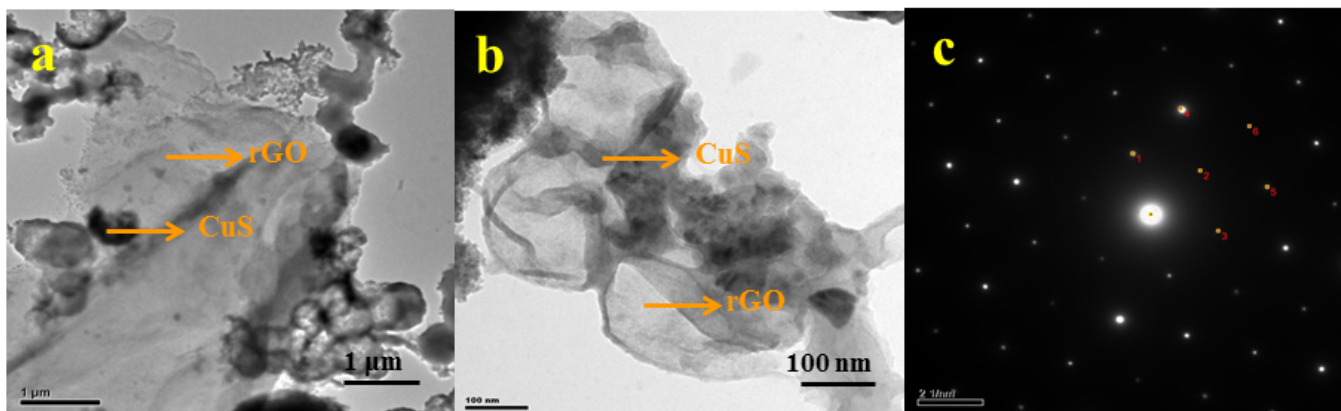

**Fig. S1** High resolution TEM images of (a) CuS/rGO-x composites and (b) SAED pattern

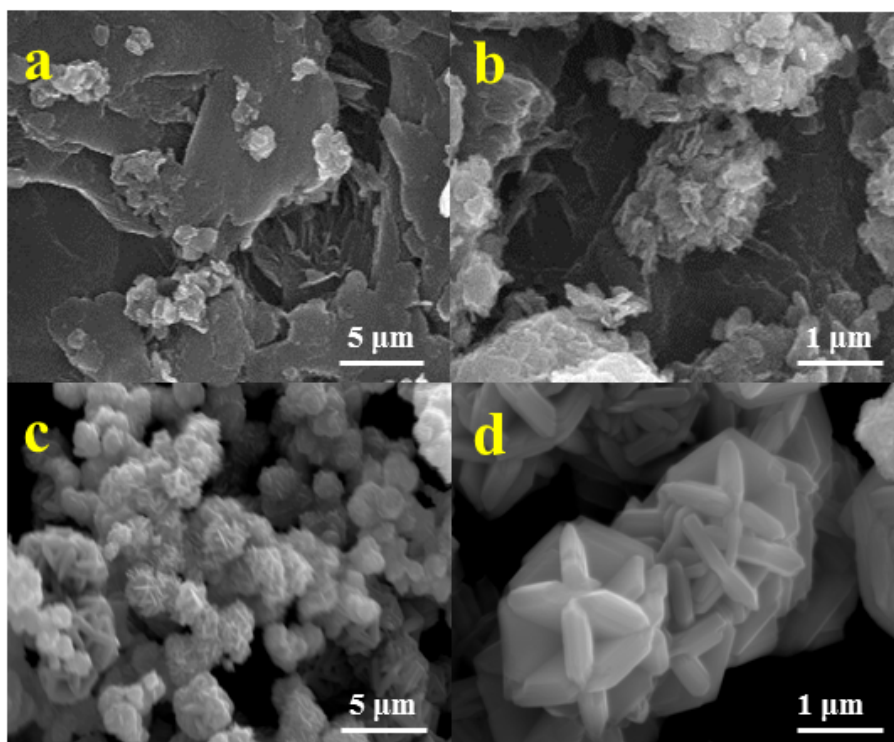

**Fig. S2** High resolution SEM images of CuS/rGO-x composites (a-b) and pure CuS (c-d).

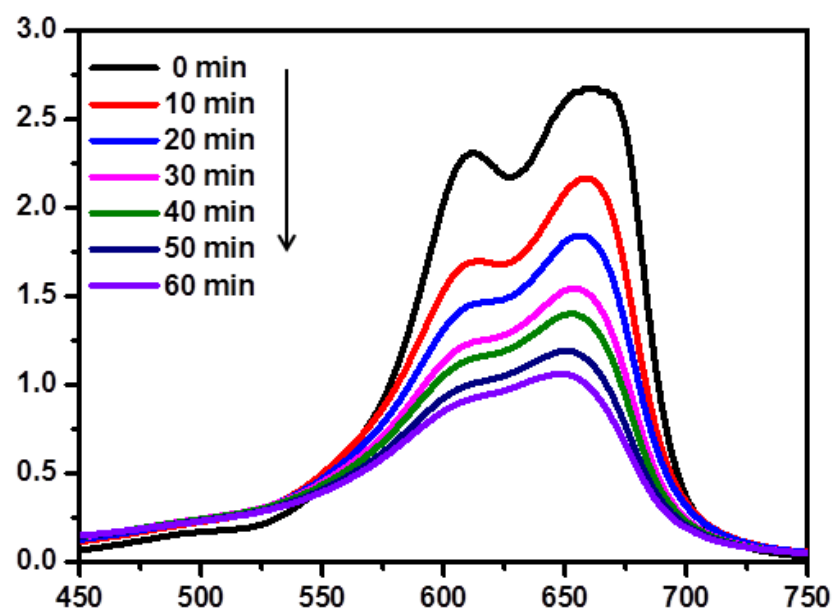

**Fig. S3** Photodecolourization of CuS/rGO composite by stirrer mixing for methylene blue dye under visible light irradiation.
